# Supplementary material for: Exploiting interconnected synthetic lethal interactions between PARP inhibition and cancer cell reversible senescence
Source: Nat Commun. 2019 Jun 11;10:2556. doi: 10.1038/s41467-019-10460-1 (PMC6560032; doi:10.1038/s41467-019-10460-1)
Supplement: Supplementary file 1 — Supplementary information [file 41467_2019_10460_MOESM1_ESM.pdf]

**Exploiting interconnected synthetic lethal interactions between PARP inhibition  
and cancer cell reversible senescence**

Fleury et al.

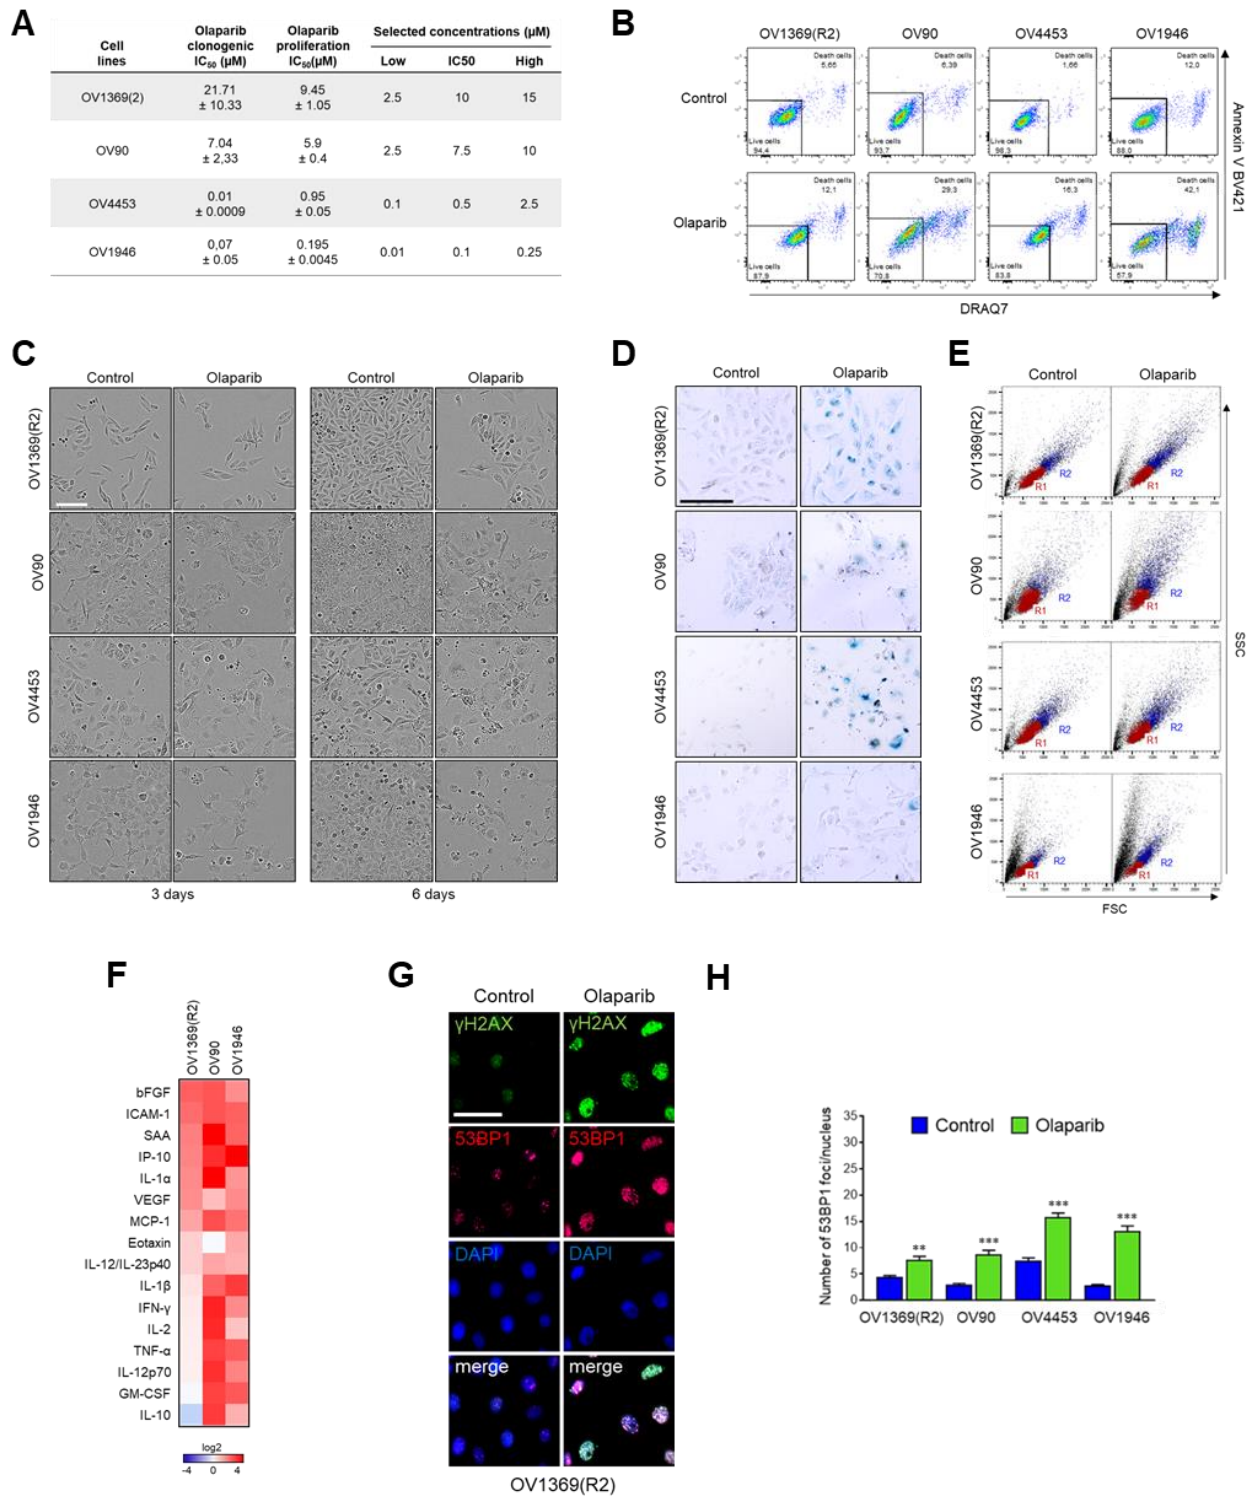

**Supplementary Figure 1. Olaparib induces a senescent phenotype in HGSOC cell lines.**

**A)** Table of Olaparib IC<sub>50</sub> (μM) displaying mean ± SEM data obtained by previous clonogenic assays<sup>4</sup> or by proliferation assays after 6 days of treatment. These data determined the low, IC<sub>50</sub> and high concentrations used in this study. **B)** Representative flow cytometry analysis of apoptosis showing DRAQ7 positive cell population (X-axis) and AnnexinV positive cells (Y-axis) at day 6. Scale bar, 150μm. **C)** Images represent control and Olaparib-treated HGSOC cells at day 3 and 6 of Olaparib IC<sub>50</sub> treatment. **D)** Representative morphology and SAβgal staining image for HGSOC cells treated

for 6 days with Olaparib IC<sub>50</sub> concentration. Scale bar, 200µm. **E)** Representative flow cytometry analysis of the cell population plot for forward scatter factor (FSC, indicative of size, X-axis) and side scatter factor (SSC, indicative of granularity, Y-axis) (R2 (blue) =high FSC and SSC; R1 (red) = normal FSC and SSC) after 6 days of Olaparib IC<sub>50</sub> concentration. **F)** Levels of secreted cytokines were measured by MSD serum based multiplex assay following 6 days treatment with Olaparib IC<sub>50</sub> concentrations. **G)** Representative images of immunofluorescence of γH2AX (green) and 53BP-1 (Red) in OV1369(R2) cells untreated or treated 6 days with 5µM of Olaparib. Nuclei were counterstained with DAPI (bleu). Scale bar, 50µm. **H)** Number of 53BP1 foci per nucleus in HGSOC cells lines treated with Olaparib IC<sub>50</sub> concentrations for 6 days. Data in **(B-E, G)** are a representation of at least three independent experiments. For all the data, the mean ± SEM of three independent experiments is shown. Data were analyzed using the two-tail Student t-test. \* Denotes  $p < 0.05$ , \*\*  $p < 0.01$ , and \*\*\*  $p < 0.001$ .

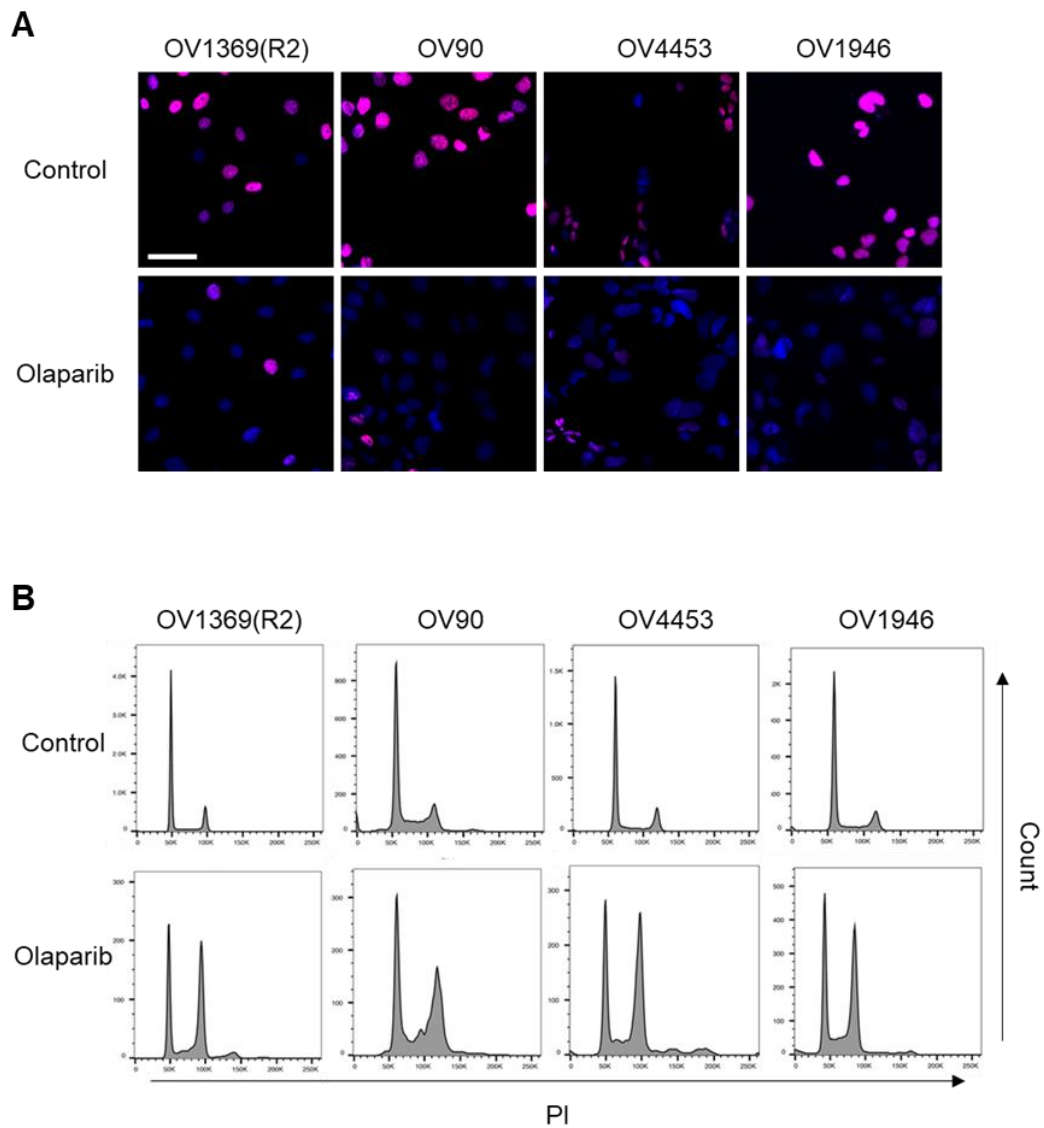

**Supplementary Figure 2. Olaparib induces a stalled cell cycle in HGSOC cells.**

**A)** Representative images of 8-hour EdU (Red) pulse after 6 days exposure of HGSOC cells to Olaparib IC<sub>50</sub> concentrations. Nuclei were counterstained with DAPI (bleu). Scale bar, 50μm. **B)** Representative flow cytometry analysis of cell cycle showing PI levels (X-axis) and cell count (Y-axis) at day 6. Data in **(B)** are a representation of at least three independent experiments.

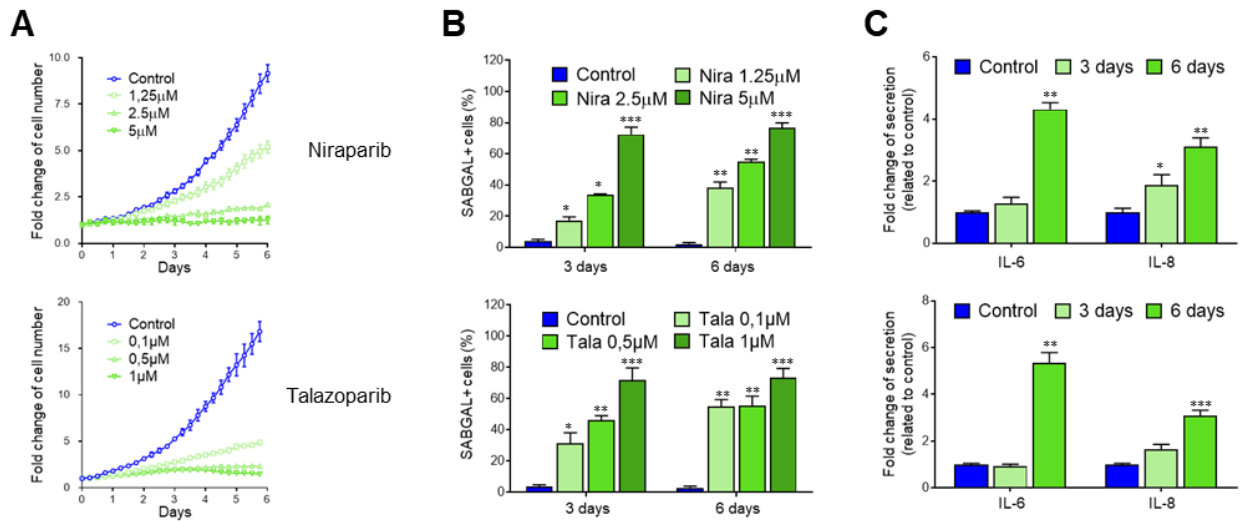

**Supplementary Figure 3. Other PARPis also induce the senescence-like phenotype in HGSOc cells.**

**A)** Cell proliferation curves were plotted with OV1369(R2) H2B-GFP cell line exposed to increasing concentrations of Niraparib or Talazoparib. **B-C)** Analyses of OV1369(R2) after 3 or 6 days in different concentrations of Niraparib and Talazoparib for levels of SA- $\beta$ -gal positive cells (**B**) or 2.5  $\mu$ M Niraparib and 0.5  $\mu$ M Talazoparib for IL-6 and IL-8 levels (**C**). Data in (**A**) are representative curves of at least three independent experiments. For all the data, the mean  $\pm$  SEM of three independent experiments is shown. Data were analyzed using the two-tail Student t-test. \* Denotes  $p < 0.05$ , \*\*  $p < 0.01$ , and \*\*\*  $p < 0.001$

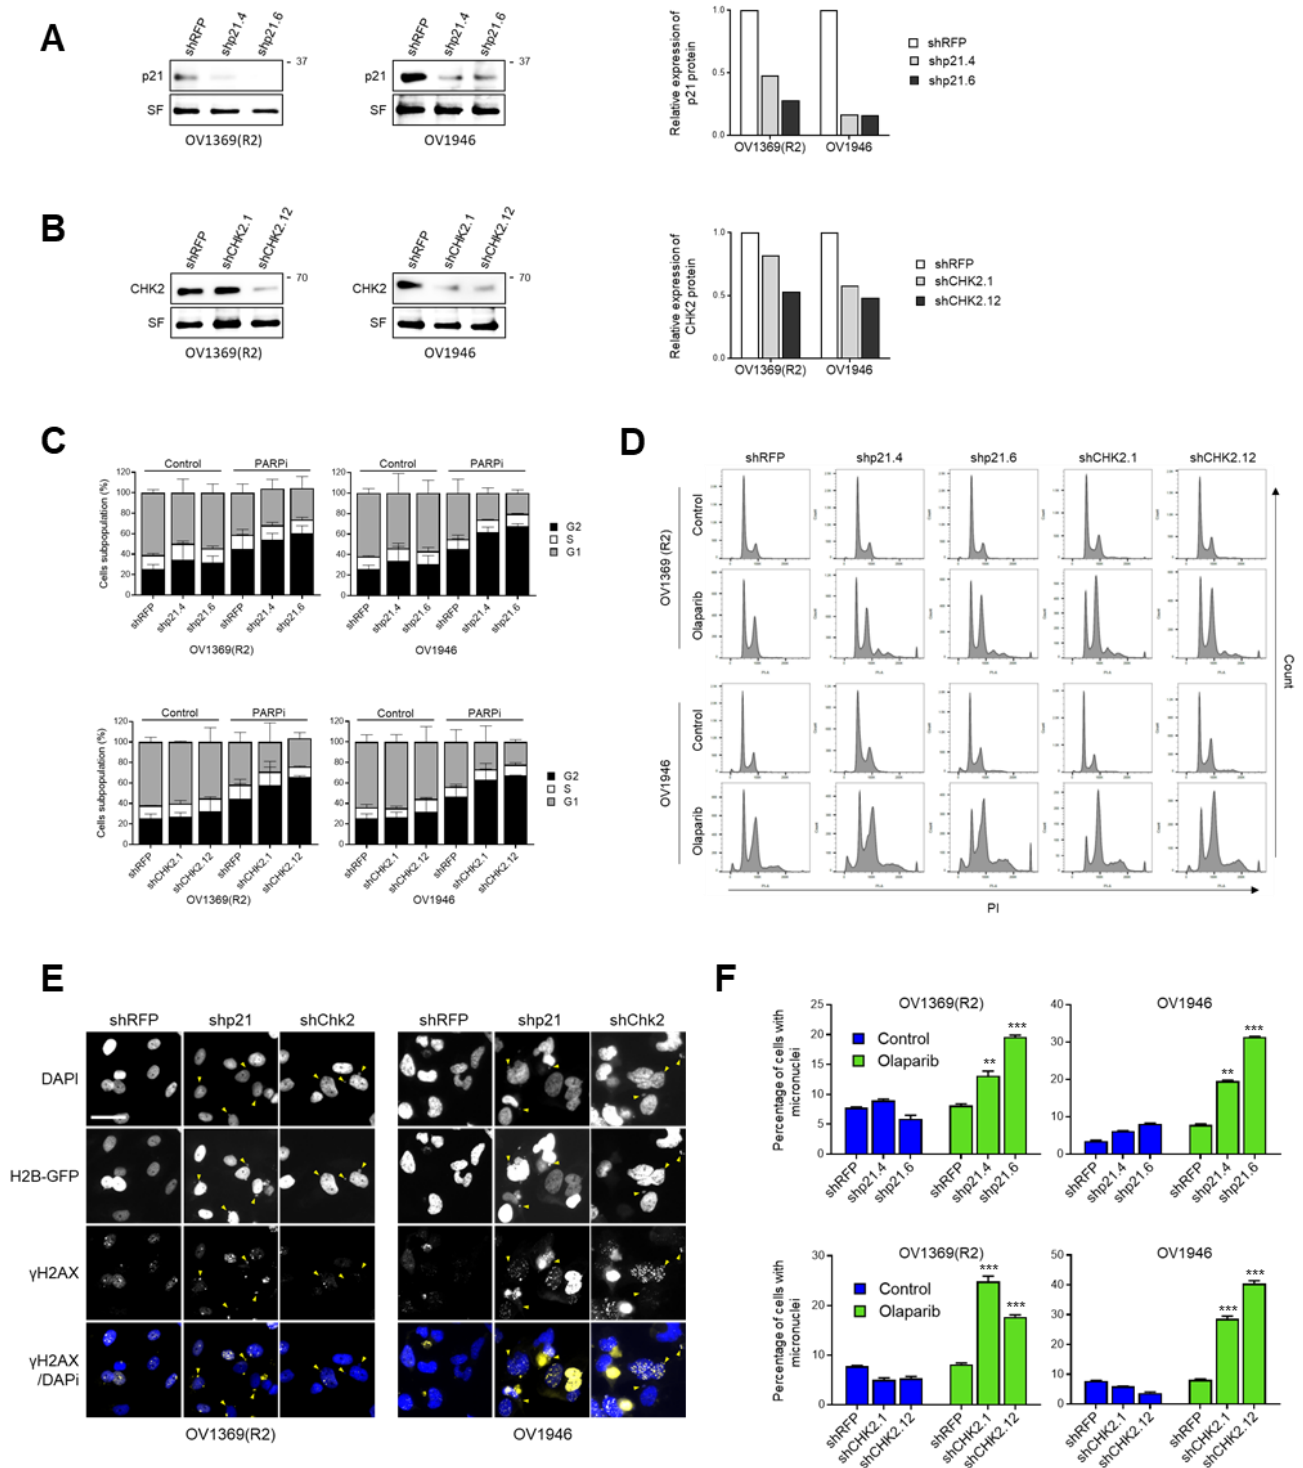

**Supplementary Figure 4. Cell fate of HGSOc cells after p21 or Chk2 knockdown.**

**A-B)** Western blot showing protein silencing by shRNA against p21 (**A**) or Chk2 (**B**) in HGSOc cells. **C)** Flow cytometry analysis of cell cycle populations following 6 days exposure of shp21 or shChk2 infected HGSOc cells to Olaparib IC<sub>50</sub> concentrations. **D)** Representative flow cytometry analysis of DNA content (PI) following 6 days exposure of shp21 or shChk2 infected HGSOc cells to Olaparib IC<sub>50</sub> concentrations. **E)** Representative images of  $\gamma$ -H2AX (yellow) immunofluorescence and micronuclei after 6 days of Olaparib IC<sub>50</sub> treatment compared with non-treated controls. Yellow arrows represent micronuclei. Nuclei were counterstained with DAPI (bleu). Scale bar, 50 $\mu$ m. **F)**

Number of micronuclei per cells in shp21 or shChk2 infected HGSOC cells after 6 days of Olaparib  $IC_{50}$  were determined by analyzing >150 cells per condition. Data in **(A, D)** are a representation of at least three independent experiments. For all the data, the mean  $\pm$  SEM of three independent experiments is shown. Data were analyzed using the two-tail Student t-test. \* Denotes  $p < 0.05$ , \*\*  $p < 0.01$ , and \*\*\*  $p < 0.001$ .

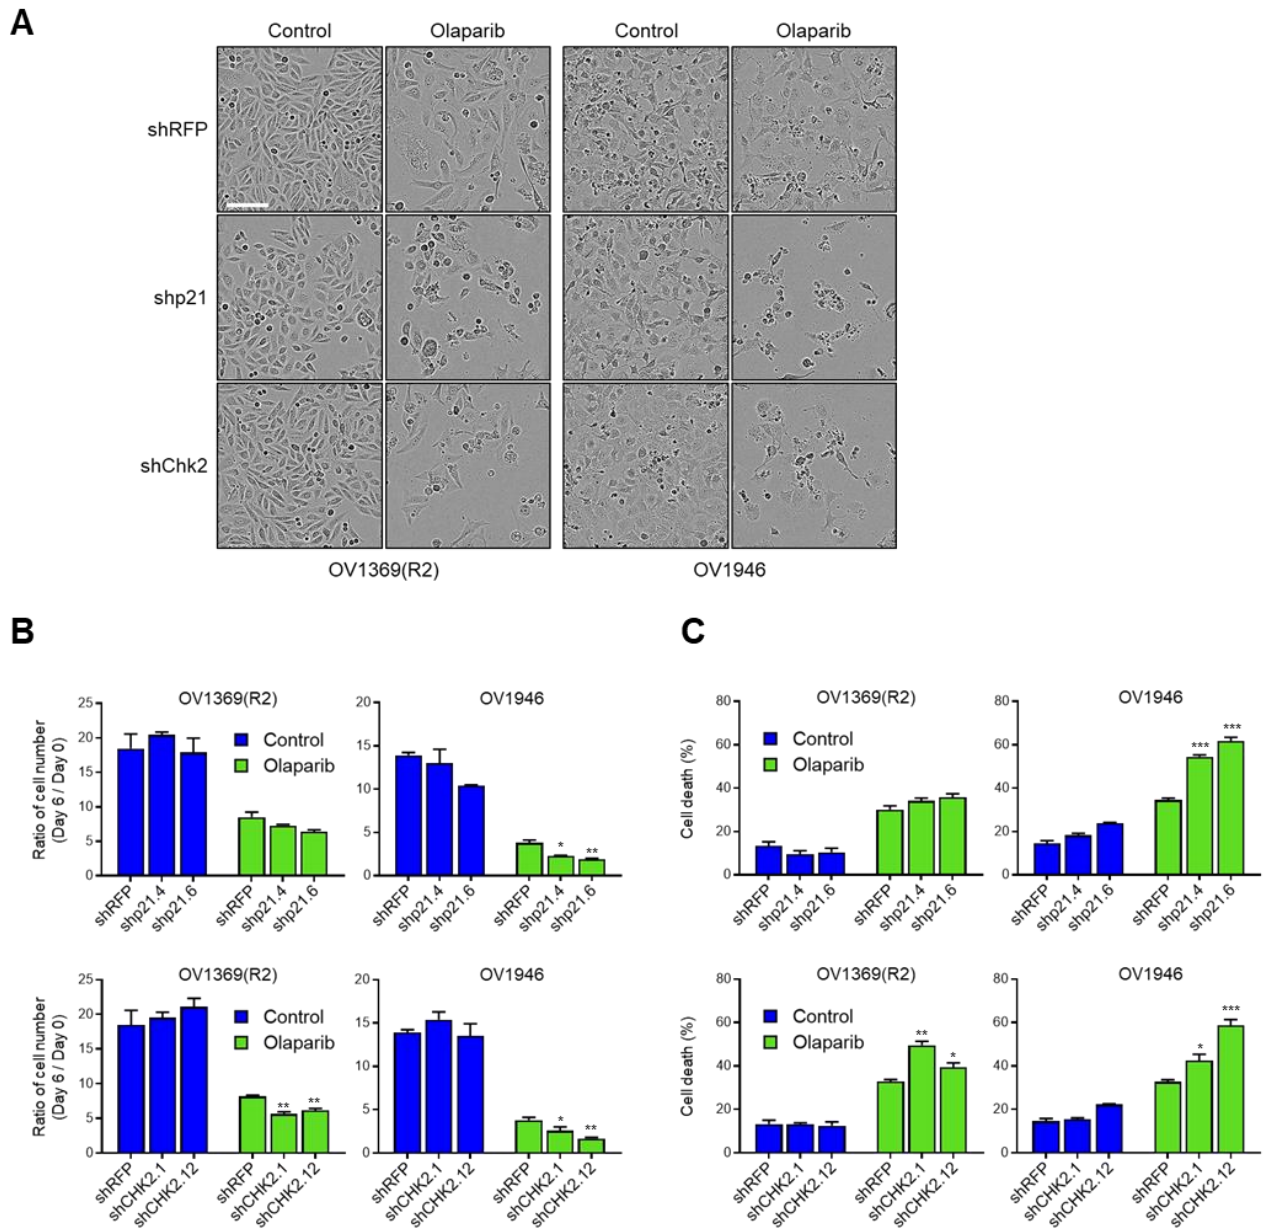

**Supplementary Figure 5. Cell viability of HGSOC cells after p21 or Chk2 knockdown.**

**A)** Representative images in phase-contrast microscopy of OV1369(R2) and OV1946 HGSOC cell lines, expressing shRFP, shp21 or shChk2, which were exposed to Olaparib IC<sub>50</sub> concentrations for 6 days. Scale bar, 150µm. **B)** Fold change in cell number in shp21 or shChk2 infected HGSOC H2B-GFP cells treated to Olaparib IC<sub>50</sub> concentrations. **C)** Percentage of dead cells analyzed by flow cytometry of shp21 or shChk2 infected HGSOC H2B-GFP cells treated to Olaparib IC<sub>50</sub> concentrations. For all the data, the mean  $\pm$  SEM of three independent experiments is shown. Data were analyzed using the two-tail Student t-test. \* Denotes  $p < 0.05$ , \*\*  $p < 0.01$ , and \*\*\*  $p < 0.001$

**A**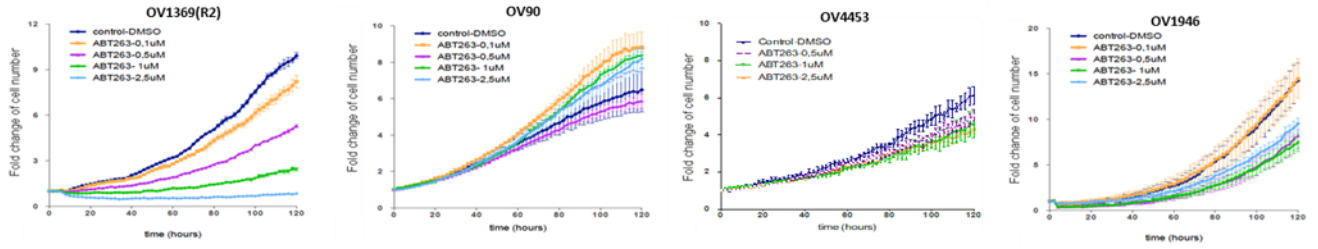**B**

|  | OV1369(R2) |         | OV90     |         | OV1946   |         | OV4453   |         |
|--|------------|---------|----------|---------|----------|---------|----------|---------|
|  | Olaparib   | ABT-263 | Olaparib | ABT-263 | Olaparib | ABT-263 | Olaparib | ABT-263 |
|  | Ratio      | 75      | 1        | 7.5     | 1        | 0.1     | 0.1      | 1       |
|  | D1         | 1       | 0.013    | 1       | 0.13     | 0.001   | 0.01     | 0.001   |
|  | D2         | 2.5     | 0.03     | 2.5     | 0.33     | 0.01    | 0.1      | 0.01    |
|  | D3         | 5       | 0.07     | 5       | 0.66     | 0.05    | 0.5      | 0.05    |
|  | D4         | 7.5     | 0.1      | 7.5     | 1        | 0.1     | 1        | 0.1     |
|  | D5         | 10      | 0.13     | 10      | 1.33     | 0.2     | 2        | 0.2     |
|  | D6         | 15      | 0.2      | 15      | 2        | 0.3     | 3        | 0.3     |
|  | D7         | 25      | 0.33     | 25      | 3.33     | 0.5     | 5        | 0.5     |

**C**

| Name             | Target        | IC <sub>50</sub> (μM)-<br>OV1369(R2) | IC <sub>50</sub> (μM)-<br>OV1946 |
|------------------|---------------|--------------------------------------|----------------------------------|
| ABT-263          | BCL-2; BCL-XL | 0,34                                 | 2,58                             |
| ABT-199          | BCL-2         | 4,38                                 | 6,06                             |
| A-1155463 (A115) | BCL-XL        | 1,94                                 | 27,7                             |
| A-1331852 (A133) | BCL-XL        | 0,07                                 | 4,2                              |

**D**

|  | OV1369(R2) |         |      |       |       | OV1946  |         |      |      |
|--|------------|---------|------|-------|-------|---------|---------|------|------|
|  | ABT-263    | ABT-199 | A133 | A115  |       | ABT-263 | ABT-199 | A133 | A115 |
|  | A1         | 0,05    | 0,5  | 0,01  | 0,025 | A1      | 0,25    | 0,5  | 0,5  |
|  | A2         | 0,1     | 1    | 0,025 | 0,05  | A2      | 0,5     | 1    | 1    |
|  | A3         | 0,25    | 2,5  | 0,05  | 0,1   | A3      | 0,75    | 2,5  | 2,5  |
|  | A4         | 0,5     | 5    | 0,075 | 0,5   | A4      | 1       | 5    | 5    |
|  | A5         | 0,75    | 10   | 0,1   | 1     | A5      | 2,5     | 10   | 10   |
|  | A6         | 1       | 20   | 0,5   | 2,5   | A6      | 5       | 20   | 20   |

### Supplementary Figure 6. Bcl2/Bcl-XL inhibitors synergize with Olaparib in HGSOC cells.

**A)** Cell proliferation response of HGSOC cells to different concentrations of ABT-263 for 6 days with analysis of cell numbers every 6 hours. Control = non-treated. **B)** Table of Olaparib and ABT-263 doses (μM) used for the CI model study (constant ratio) for OV1369(R2), OV90, OV1946 and OV4453 cells. **C)** Table of ABT-263, ABT-199, A-1155463 and A-1331852 IC<sub>50</sub> data obtained after 6 days treatment. **D)** Table of ABT-263, ABT-199, A-1155463 (A115) and A-1331852 (A133) doses (μM) used for the Bliss model study for the OV1369(R2) and OV1946 cell lines. Data in (A,C) are representative curves of at least three independent experiments.

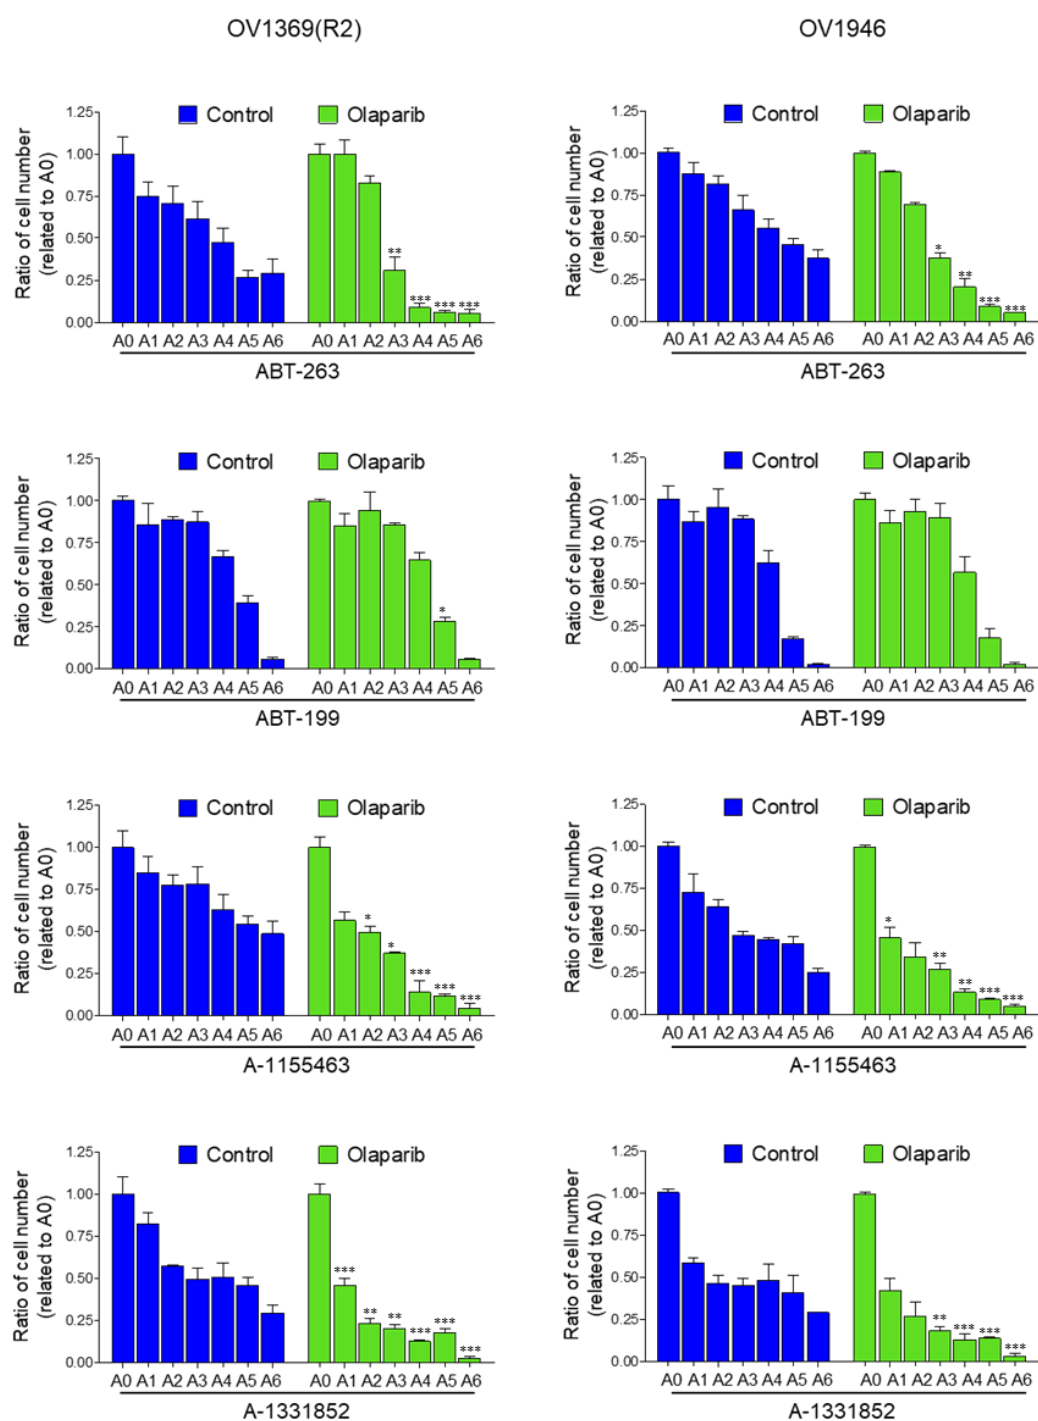

**Supplementary Figure 7. Cell viability of Olaparib and distinct Bcl2/Bcl-XL inhibitors co-treatment.**

Cells were co-treated with Olaparib IC<sub>50</sub> concentrations and a range of ABT-263, ABT-199, A-1155463 or A-1331852 concentrations (see Supplementary Figure 6D) for 6 days. Bar graph shows mean  $\pm$  SEM of the fold change in cell numbers on day 6 related to A0 (control non-treated for blue bars; Olaparib-treated for green bars) at different concentrations of Bcl2/Bcl-XL inhibitors added on day 3. For all the data, the mean  $\pm$  SEM of three independent experiments is shown. Data were analyzed using the two-tail Student t-test. \* Denotes  $p < 0.05$ , \*\*  $p < 0.01$ , and \*\*\*  $p < 0.001$ . Statistical analyses were performed between ABT-263 treated cells with and without Olaparib.

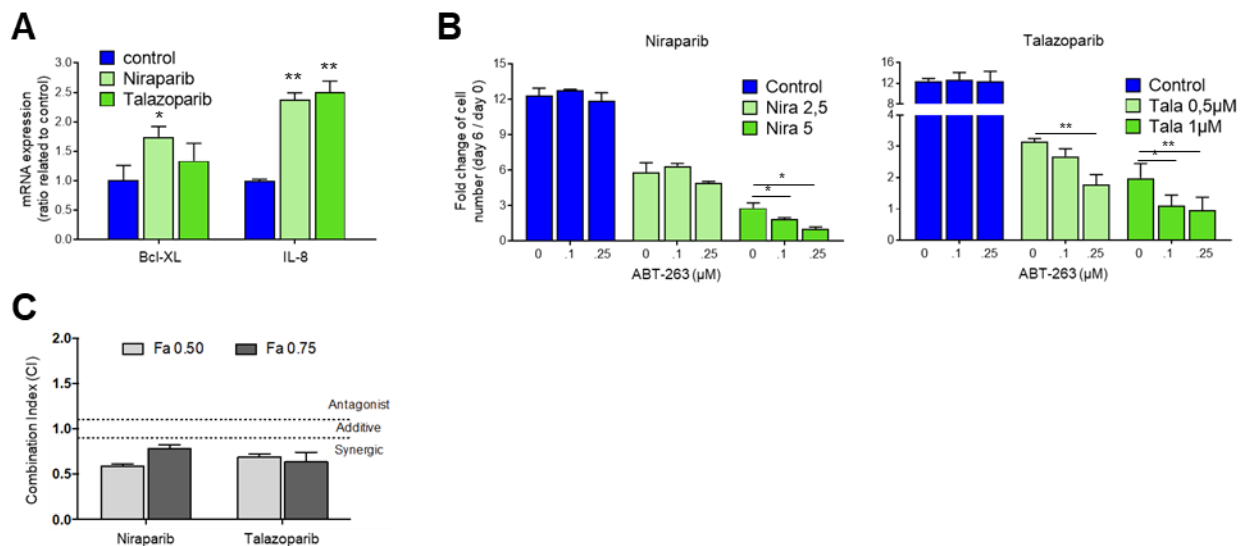

**Supplementary Figure 8. Bcl2/Bcl-XL inhibitors synergize with other PARPis in HGSOc cells.**

**A)** Relative mRNA levels of Bcl-XL and IL-8 evaluated by real-time Q-PCR in OV1369(R2) treated with 2.5μM Niraparib or 0.5μM Talazoparib for 6 days. **B)** Fold change in cell number for OV1369(R2) cells co-treated with Niraparib/ABT-263 or Talazoparib/ABT-263 for 6 days. **C)** Bar graph represents the CI at 0.50 and 0.75 fraction affected (Fa) of OV1369(R2) treated with Niraparib/ABT263 (10/1 ratio) or Talazoparib/ABT-263 (2/1 ratio). For all the data, the mean ± SEM of three independent experiments is shown. Data were analyzed using the two-tail Student t-test. \* Denotes  $p < 0.05$ , \*\*  $p < 0.01$ , and \*\*\*  $p < 0.001$

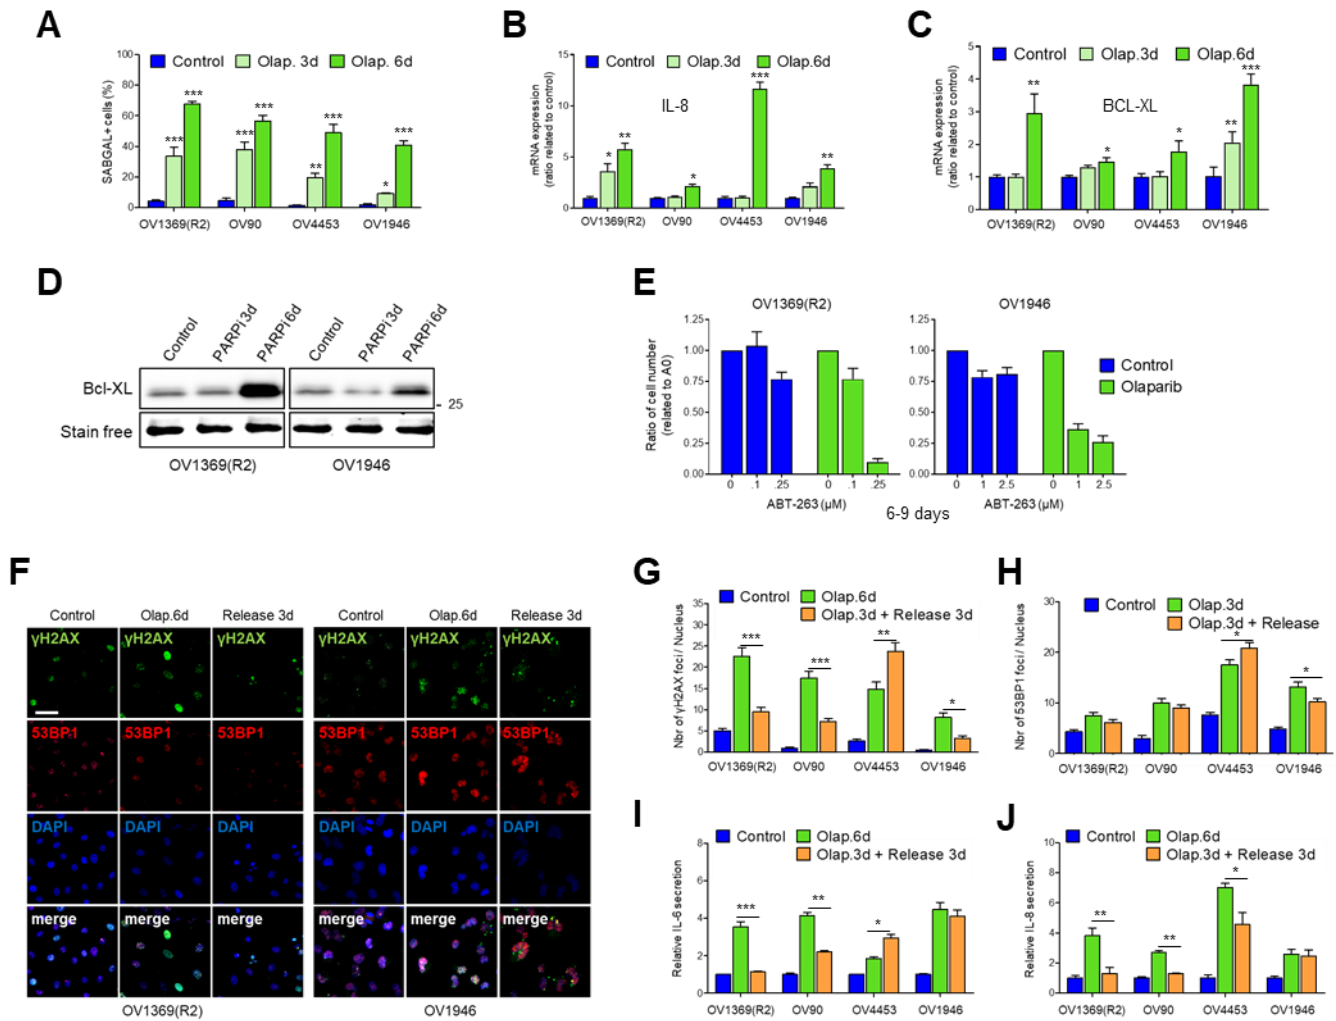

**Supplementary Figure 9. Olaparib induces a gradual senescence phenotype targeted by senolytics.**

**A**) SAβgal positive cells following exposure of HGSOc cells to Olaparib (Olap.) IC<sub>50</sub> concentrations for 3 or 6 days. **B-C**) Real-time Q-PCR to evaluate the relative mRNA levels of IL-8 (**B**) and BCLXL (**C**) in HGSOc cells treated for 3 or 6 days with Olaparib IC<sub>50</sub> concentration. Bars represent mean ± SEM of the fold change expression relative to control obtained in three independent experiments. **D**) Western blot detection of Bcl-XL on HGSOc cells treated with Olaparib for 3 or 6 days. **E**) OV1369(R2) and OV1946 cells were treated with Olaparib IC<sub>50</sub> concentrations for 9 days with sequential addition of ABT-263 after 6 days of Olaparib. Bar graph shows mean ± SEM of the fold change in cell number related to A0 (control non-treated for blue bars; Olaparib-treated for green bars) at different ABT-263 concentrations. **F**) Representative images of γ-H2AX (green) and 53BP1 (red) immunostaining after 6 days Olaparib or 3 days Olaparib and then without drug for another 3 days of two selected cell lines [OV1369(R2) and OV1946]. Nuclei were counterstained with DAPI (bleu). Scale bar, 50 μm. **G-H**) Cells under Olaparib IC<sub>50</sub> treatment, the removal protocol and controls were stained for γ-H2AX (**G**) and 53BP1 (**H**) and analyzed by immunofluorescence imaging. **H-I**) Levels of IL-6 (**H**) and IL-8 (**I**) in HGSOc cells following treatment regimen of Fig.3B. Data in (**D**) are a representation of at least three independent experiments. For all the data, the mean ± SEM of three independent experiments is shown. Data were analyzed using the two-tail Student t-test. \* Denotes  $p < 0.05$ , \*\*  $p < 0.01$ , and \*\*\*  $p < 0.001$

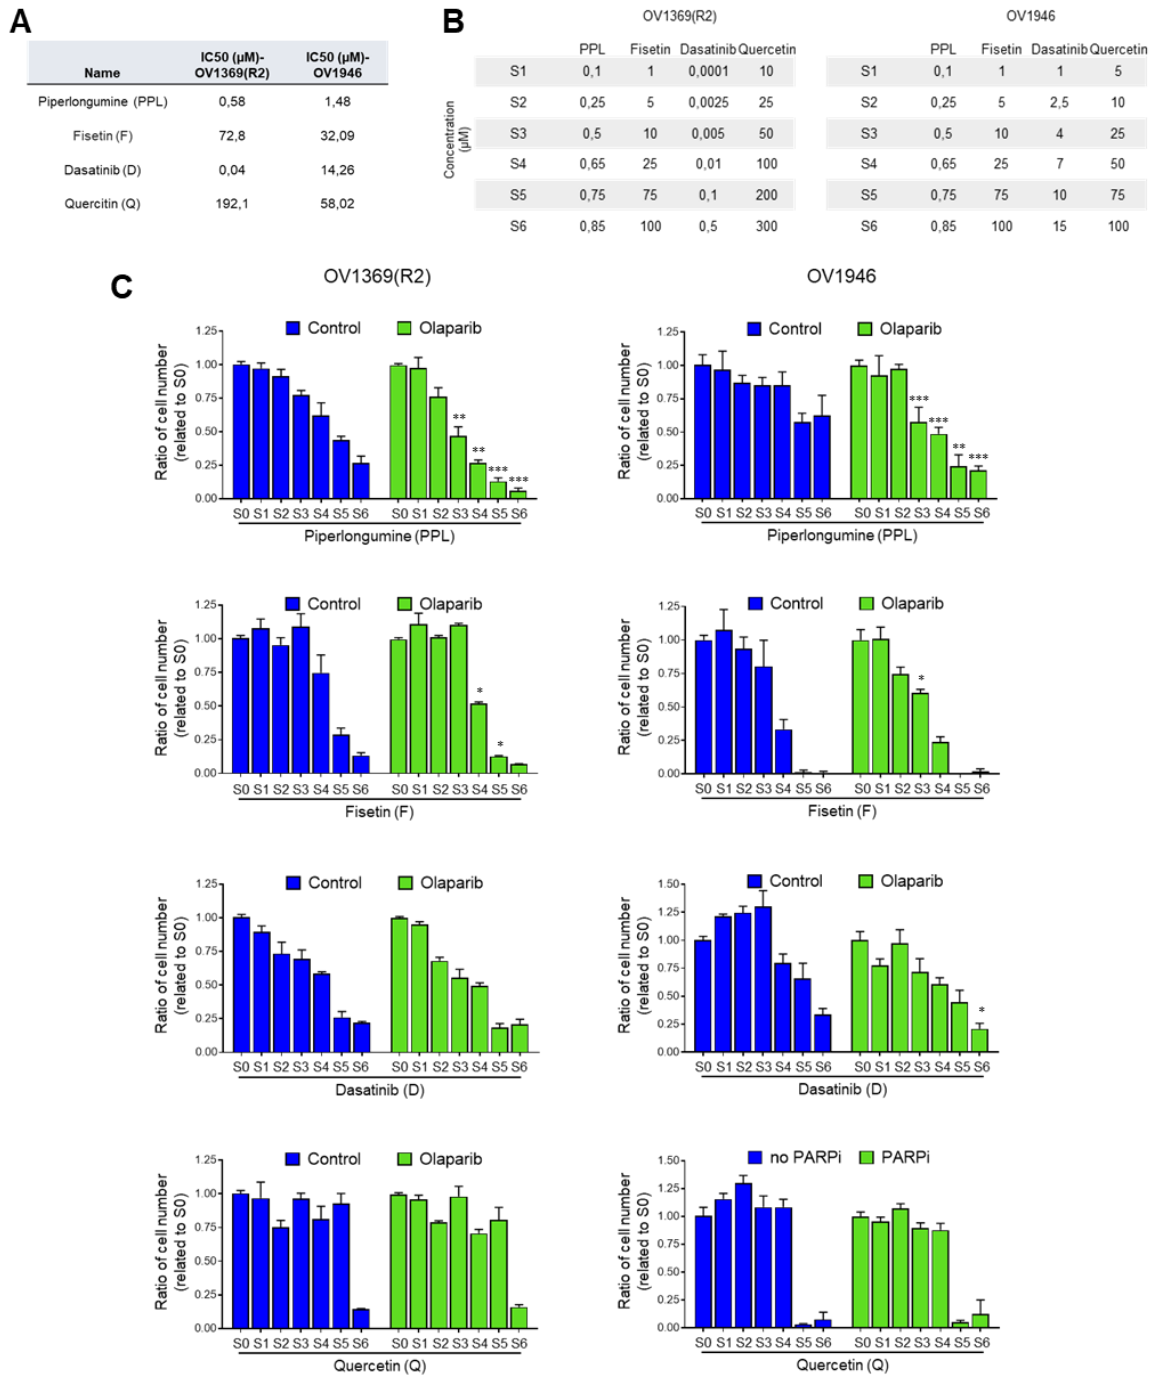

**Supplementary Figure 10. Distinct senolytic drugs synergize with Olaparib in HGSOc cells.**

**A)** Table of Piperlongumine (PPL), Fisetin (F), Dasatinib (D) and Quercetin (Q) IC<sub>50</sub> (μM) displaying mean ± SEM data obtained after 6 days proliferation of OV1369(R2) and OV1946 cells; these data determined the range of concentrations used for this study. **B)** Table of PPL, F, D and Q doses (μM) used for combination treatments with Olaparib in OV1369(R2) and OV1946 cell lines. **C)** Cells were co-treated with Olaparib IC<sub>50</sub> concentrations and a range of PPL, F, D or Q concentrations for 6 days. Bar graph shows mean ± SEM of the fold change in cell number related to S0 (control non-treated, blue bars; Olaparib-treated, green bars) at different concentrations of the senolytic drugs. For all the data, the mean ± SEM of three independent experiments is shown. Data were analyzed using the two-tail Student t-test. \* Denotes  $p < 0.05$ , \*\*  $p < 0.01$ , and \*\*\*  $p < 0.001$ . Statistical analyses were performed between ABT-263 treated cells with and without Olaparib.

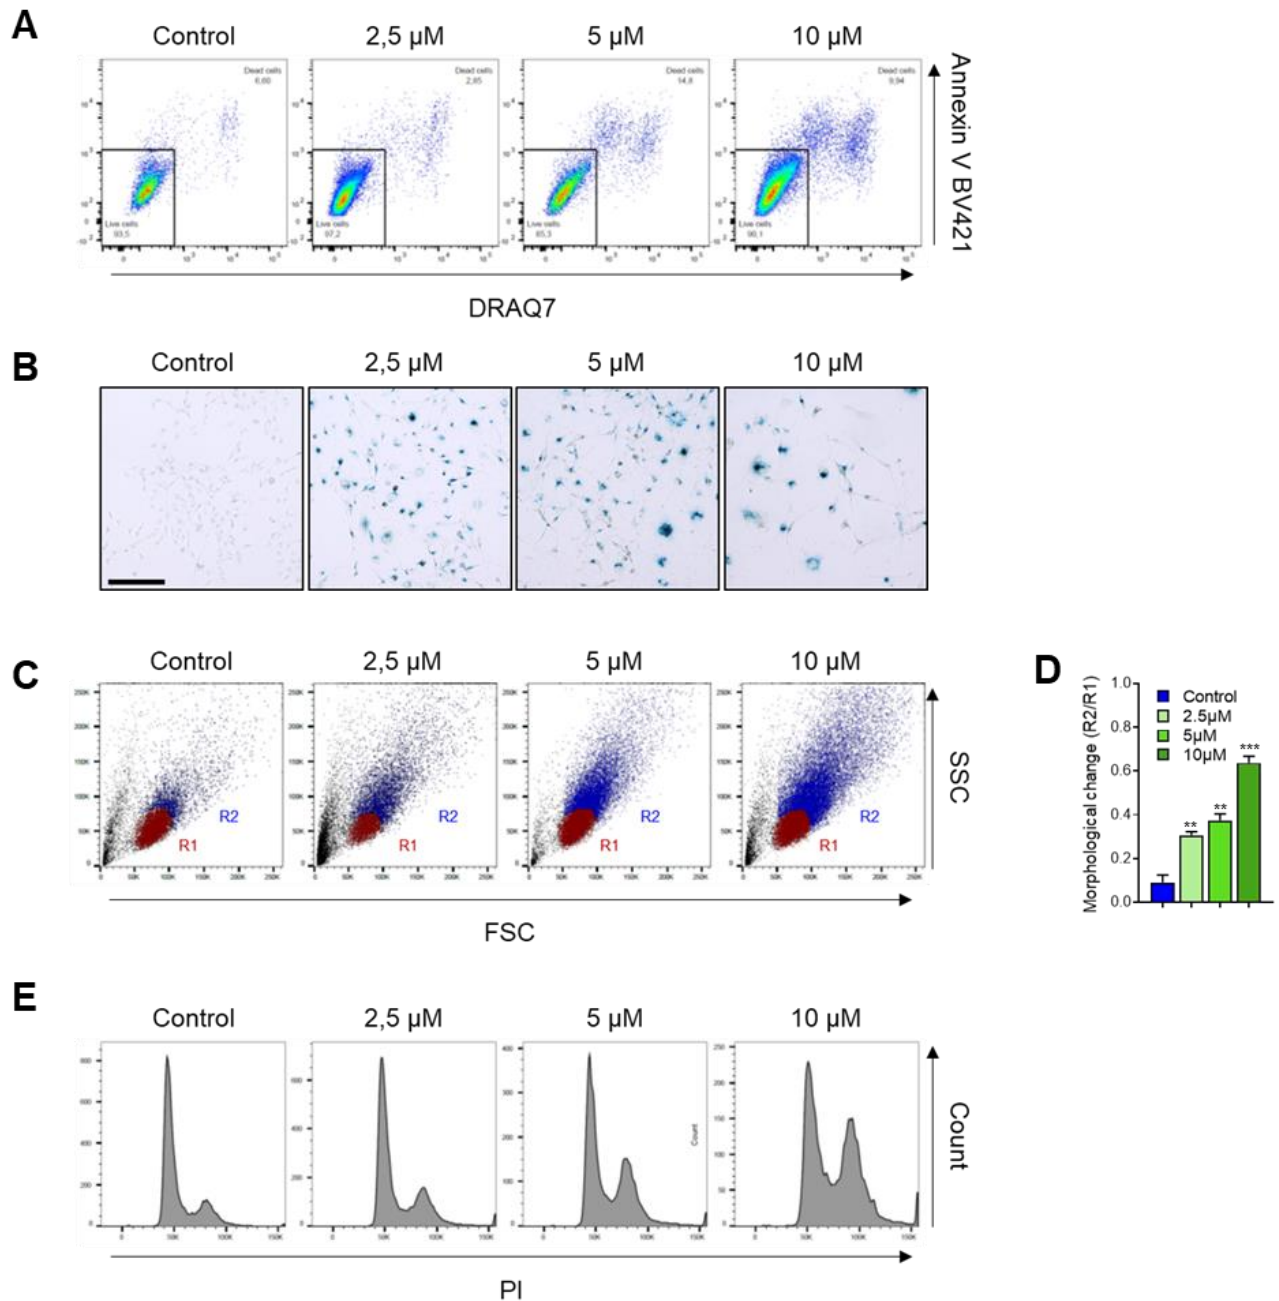

**Supplementary Figure 11. Olaparib induces senescence-like phenotype in a TNBC cell line.**

**A-E)** MDA-MB-231 cells were treated for 6 days with 2.5 $\mu$ M, 5 $\mu$ M or 10 $\mu$ M Olaparib. **A)** Representative flow cytometry analysis of apoptosis. **B)** Representative morphology and SA $\beta$ gal staining images. Scale bar, 200 $\mu$ m. **C-D)** Representative flow cytometry analysis (**C**) and quantification (**D**) of the cell population plot for forward scatter factor (FSC, indicative of size, X-axis) and side scatter factor (SSC, indicative of granularity, Y-axis) (R2 (blue) = high FSC and SSC; R1 (red) = normal FSC and SSC). **E)** Representative flow cytometry analysis of cell cycle showing PI levels (X-axis) and cell count (Y-axis). Data in (**A-C, E**) are a representation of at least three independent experiments. For data in **D**, the mean  $\pm$  SEM of three independent experiments is shown. Data were analyzed using the two-tail Student t-test. \* Denotes  $p < 0.05$ , \*\*  $p < 0.01$ , and \*\*\*  $p < 0.001$

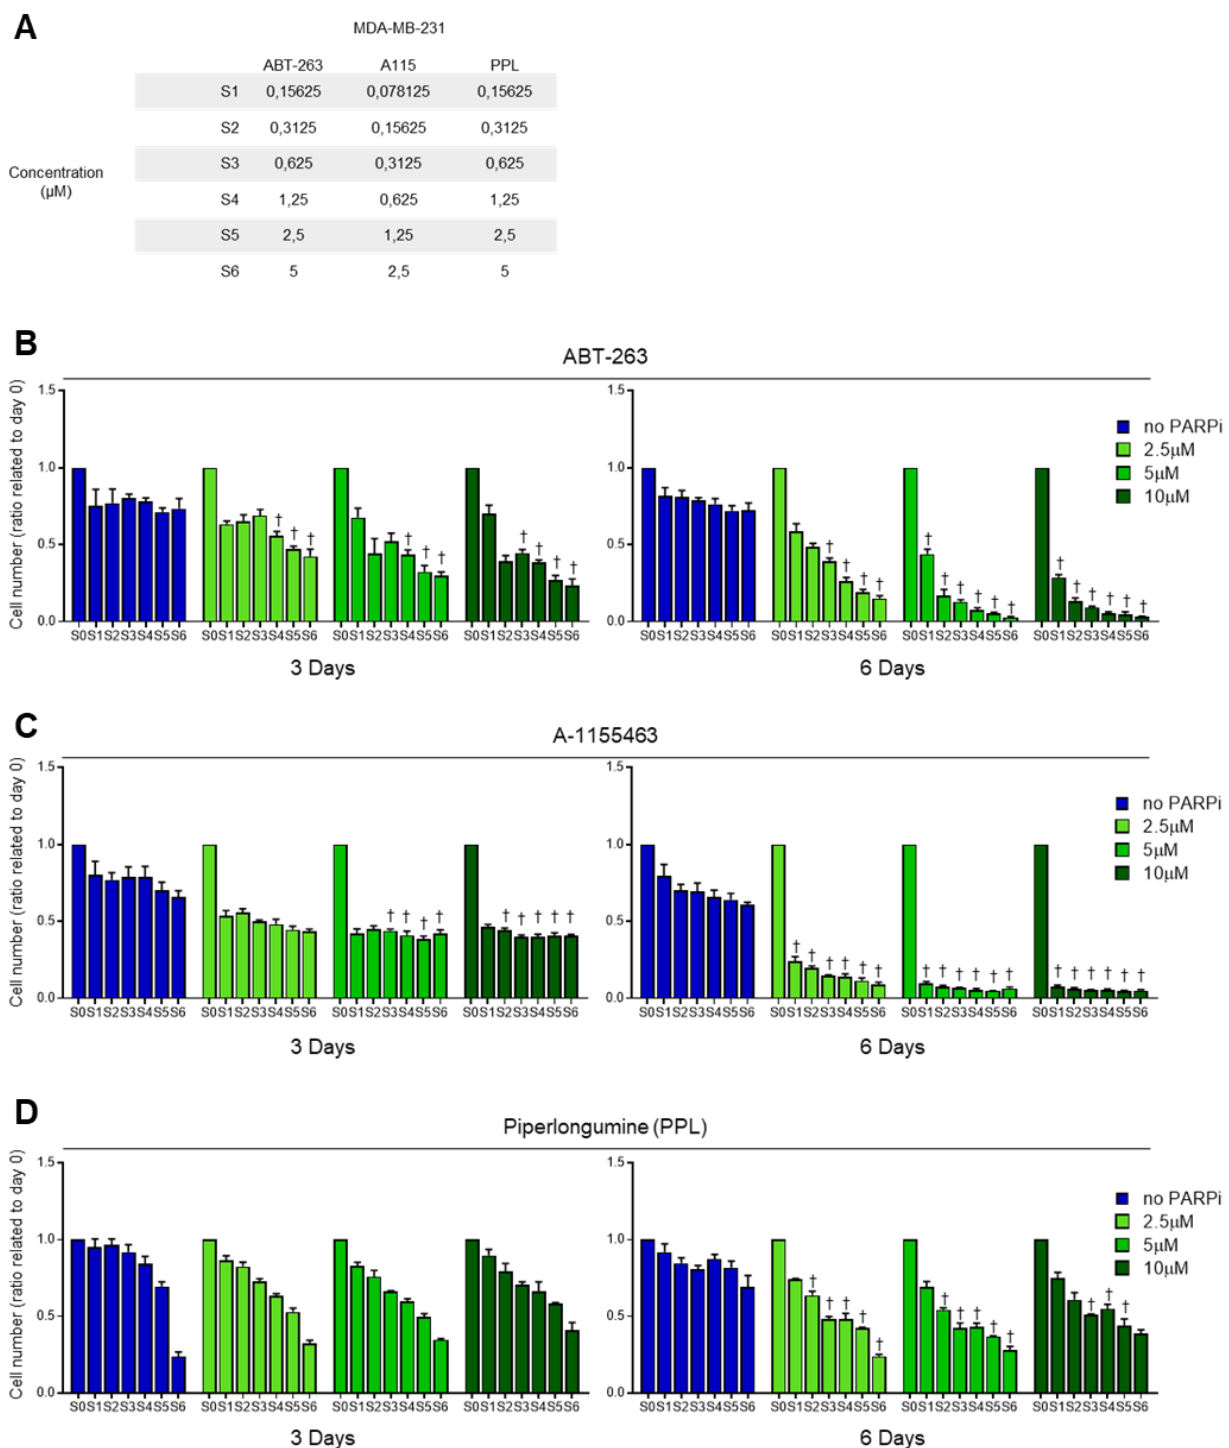

**Supplementary Figure 12: Distinct senolytic drugs synergize with Olaparib in TNBC cell line.**

**A)** Table of ABT-263, A-115463 and Piperlongumine (PPL) doses (μM) used for combination treatments with Olaparib in MDA-MB-231 cell lines. **B-D)** Cells were co-treated with Olaparib 2.5μM, 5μM and 10μM concentrations and a range of ABT-263 (**B**), A-1155463 (**C**) and PPL (**D**) concentrations for 6 days. Bar graph shows mean ± SEM of the fold change in cell number related to day 0 (no PARP: blue bars; Olaparib-treated, green bars) at different concentrations of Olaparib and senolytic drugs. For all the data, the mean ± SEM of three independent experiments is shown. Data were analyzed using the two-tail Student t-test. † Denotes  $p < 0.01$ . Statistical analyses were performed between ABT-263 treated cells with and without Olaparib.

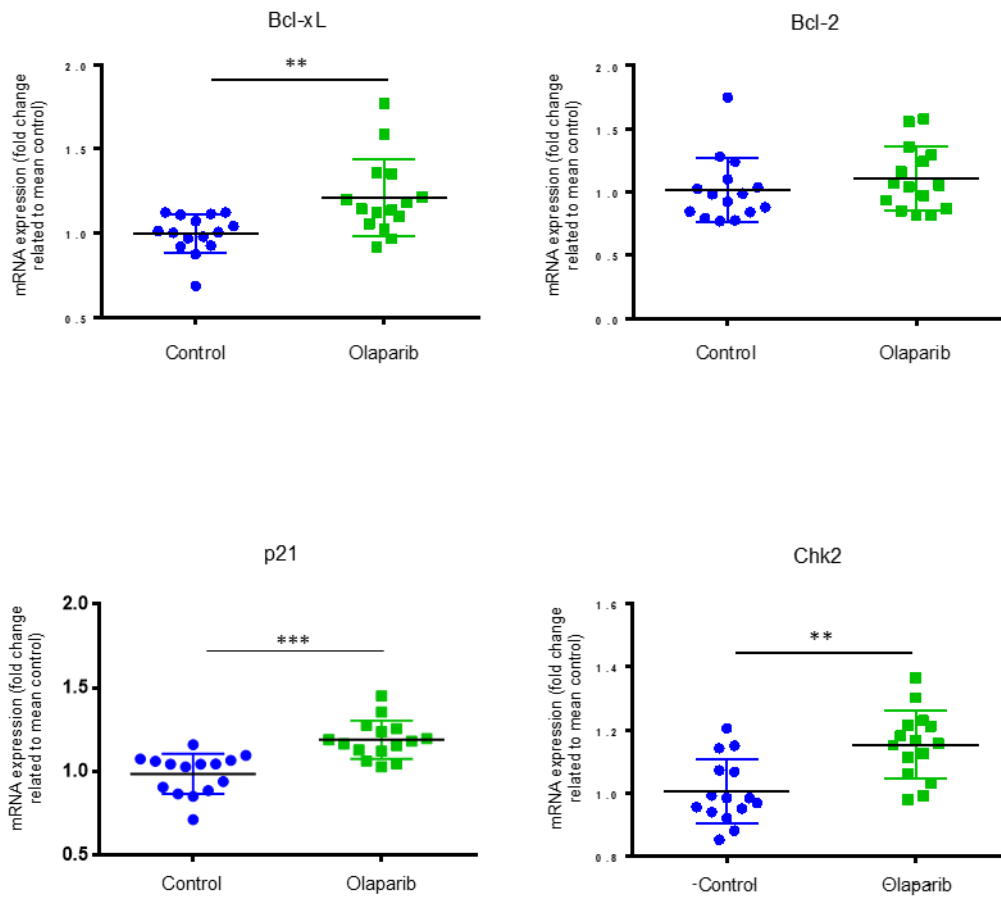

**Supplementary Figure 13: Gene expression analysis of selected Olaparib-induced senescent markers on MDA-MB-231 xenograft tumors.**

Q-PCR was performed to determine the expression levels of BCL-XL, BCL2, p21 and CHK2 in xenograft tumor tissues harvested from mice treated with Olaparib or vehicle for 12 days (each data point correspond to one tumor, n=15 for each group). For all the data, the mean  $\pm$  SEM of three independent experiments is shown. Data were analyzed using the two-tail Student t-test. \* Denotes  $p < 0.05$ , \*\*  $p < 0.01$ , and \*\*\*  $p < 0.001$ .

Figure 4I

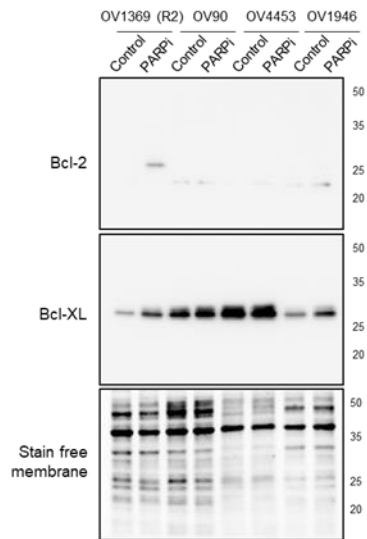

Figure 6G

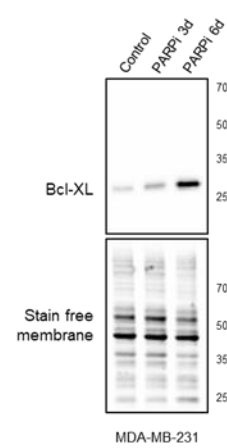

Supplementary Figure 4A

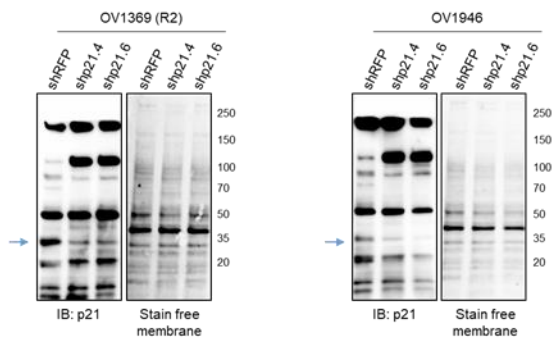

Supplementary Figure 9D

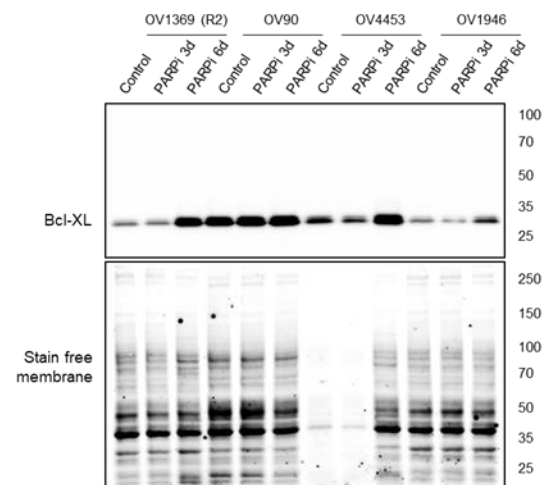

Supplementary Figure 4B

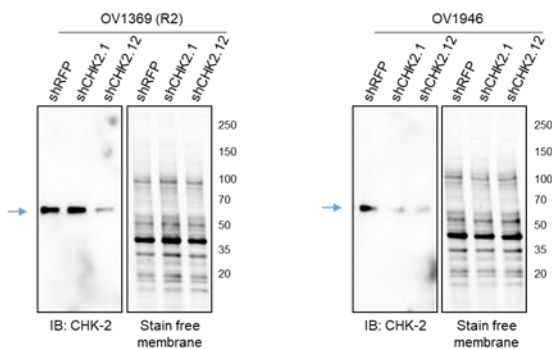

Supplementary Figure 14: Original image of western blots and stain free membranes.

**OV4453 2-way Anova test with Bonferroni post-test corrections**

| Bonferroni's multiple comparisons test | 95,00% CI of diff, | Significant? | Summary | Adjusted P Value |
|----------------------------------------|--------------------|--------------|---------|------------------|
| Row 1 day 0                            |                    |              |         |                  |
| Control vs. Olaparib                   | -0,2573 to 0,2573  | No           | ns      | >0,9999          |
| Control vs. ABT263                     | -0,2540 to 0,2540  | No           | ns      | >0,9999          |
| Control vs. Combo                      | -0,2573 to 0,2573  | No           | ns      | >0,9999          |
| Olaparib vs. ABT263                    | -0,2265 to 0,2265  | No           | ns      | >0,9999          |
| Olaparib vs. Combo                     | -0,2301 to 0,2301  | No           | ns      | >0,9999          |
| ABT263 vs. Combo                       | -0,2265 to 0,2265  | No           | ns      | >0,9999          |
| Row 2 day 3                            |                    |              |         |                  |
| Control vs. Olaparib                   | -0,1843 to 0,3612  | No           | ns      | >0,9999          |
| Control vs. ABT263                     | -0,2308 to 0,2773  | No           | ns      | >0,9999          |
| Control vs. Combo                      | -0,1979 to 0,3166  | No           | ns      | >0,9999          |
| Olaparib vs. ABT263                    | -0,3091 to 0,1787  | No           | ns      | >0,9999          |
| Olaparib vs. Combo                     | -0,2764 to 0,2182  | No           | ns      | >0,9999          |
| ABT263 vs. Combo                       | -0,1904 to 0,2626  | No           | ns      | >0,9999          |
| Row 3 day 7                            |                    |              |         |                  |
| Control vs. Olaparib                   | -0,1213 to 0,3933  | No           | ns      | 0,9697           |
| Control vs. ABT263                     | -0,05202 to 0,4560 | No           | ns      | 0,2134           |
| Control vs. Combo                      | 0,002082 to 0,5166 | Yes          | *       | 0,047            |
| Olaparib vs. ABT263                    | -0,1605 to 0,2925  | No           | ns      | >0,9999          |
| Olaparib vs. Combo                     | -0,1068 to 0,3534  | No           | ns      | 0,9352           |
| ABT263 vs. Combo                       | -0,1691 to 0,2838  | No           | ns      | >0,9999          |
| Row 4 day 10                           |                    |              |         |                  |
| Control vs. Olaparib                   | -0,1271 to 0,3989  | No           | ns      | >0,9999          |
| Control vs. ABT263                     | -0,04742 to 0,4722 | No           | ns      | 0,1846           |
| Control vs. Combo                      | 0,004786 to 0,5549 | Yes          | *       | 0,0437           |
| Olaparib vs. ABT263                    | -0,1500 to 0,3030  | No           | ns      | >0,9999          |
| Olaparib vs. Combo                     | -0,09985 to 0,3877 | No           | ns      | 0,7088           |
| ABT263 vs. Combo                       | -0,1729 to 0,3078  | No           | ns      | >0,9999          |
| Row 5 day 14                           |                    |              |         |                  |
| Control vs. Olaparib                   | 0,07380 to 0,5997  | Yes          | **      | 0,0045           |
| Control vs. ABT263                     | 0,1761 to 0,7092   | Yes          | ****    | <0,0001          |
| Control vs. Combo                      | 0,3367 to 0,8868   | Yes          | ****    | <0,0001          |
| Olaparib vs. ABT263                    | -0,1283 to 0,3401  | No           | ns      | >0,9999          |
| Olaparib vs. Combo                     | 0,03118 to 0,5188  | Yes          | *       | 0,0178           |
| ABT263 vs. Combo                       | -0,07859 to 0,4167 | No           | ns      | 0,4258           |
| Row 6 day 18                           |                    |              |         |                  |
| Control vs. Olaparib                   | 0,03010 to 0,6623  | Yes          | *       | 0,0234           |
| Control vs. ABT263                     | 0,1350 to 0,7515   | Yes          | ***     | 0,001            |
| Control vs. Combo                      | 0,4355 to 1,088    | Yes          | ****    | <0,0001          |
| Olaparib vs. ABT263                    | -0,1578 to 0,3518  | No           | ns      | >0,9999          |
| Olaparib vs. Combo                     | 0,1392 to 0,6922   | Yes          | ***     | 0,0005           |
| ABT263 vs. Combo                       | 0,05119 to 0,5861  | Yes          | *       | 0,0102           |
| Row 7 day 22                           |                    |              |         |                  |
| Control vs. Olaparib                   | 0,1741 to 0,8063   | Yes          | ***     | 0,0003           |
| Control vs. ABT263                     | 0,2773 to 0,8887   | Yes          | ****    | <0,0001          |
| Control vs. Combo                      | 0,5798 to 1,246    | Yes          | ****    | <0,0001          |
| Olaparib vs. ABT263                    | -0,1590 to 0,3446  | No           | ns      | >0,9999          |
| Olaparib vs. Combo                     | 0,1384 to 0,7068   | Yes          | ***     | 0,0006           |
| ABT263 vs. Combo                       | 0,05716 to 0,6024  | Yes          | **      | 0,0087           |

**Supplementary Table 1**

**OV1946 2-way Anova test with Bonferroni post-test corrections**

| Bonferroni's multiple comparisons test | 95,00% CI of diff.  | Significant? | Summary | Adjusted P Value |
|----------------------------------------|---------------------|--------------|---------|------------------|
| Row 1                                  |                     |              |         |                  |
| Control vs. Olaparib                   | -0,2615 to 0,2615   | No           | ns      | >0,9999          |
| Control vs. ABT-263                    | -0,2743 to 0,2743   | No           | ns      | >0,9999          |
| Control vs. Combo                      | -0,2652 to 0,2652   | No           | ns      | >0,9999          |
| Olaparib vs. ABT-263                   | -0,2481 to 0,2481   | No           | ns      | >0,9999          |
| Olaparib vs. Combo                     | -0,2380 to 0,2380   | No           | ns      | >0,9999          |
| ABT-263 vs. Combo                      | -0,2520 to 0,2520   | No           | ns      | >0,9999          |
| Row 2                                  |                     |              |         |                  |
| Control vs. Olaparib                   | -0,1645 to 0,3585   | No           | ns      | >0,9999          |
| Control vs. ABT-263                    | -0,3344 to 0,2141   | No           | ns      | >0,9999          |
| Control vs. Combo                      | -0,1648 to 0,3656   | No           | ns      | >0,9999          |
| Olaparib vs. ABT-263                   | -0,4052 to 0,09091  | No           | ns      | 0,5621           |
| Olaparib vs. Combo                     | -0,2346 to 0,2415   | No           | ns      | >0,9999          |
| ABT-263 vs. Combo                      | -0,09139 to 0,4126  | No           | ns      | 0,5505           |
| Row 3                                  |                     |              |         |                  |
| Control vs. Olaparib                   | -0,07042 to 0,4579  | No           | ns      | 0,3148           |
| Control vs. ABT-263                    | -0,3198 to 0,2288   | No           | ns      | >0,9999          |
| Control vs. Combo                      | -0,06820 to 0,4622  | No           | ns      | 0,2972           |
| Olaparib vs. ABT-263                   | -0,4901 to 0,01164  | No           | ns      | 0,071            |
| Olaparib vs. Combo                     | -0,2377 to 0,2442   | No           | ns      | >0,9999          |
|                                        | -0,009482 to        |              |         |                  |
| ABT-263 vs. Combo                      | 0,4945              | No           | ns      | 0,0665           |
| Row 4                                  |                     |              |         |                  |
| Control vs. Olaparib                   | -0,1093 to 0,4190   | No           | ns      | 0,7244           |
| Control vs. ABT-263                    | -0,3449 to 0,2036   | No           | ns      | >0,9999          |
| Control vs. Combo                      | -0,03849 to 0,4919  | No           | ns      | 0,1436           |
| Olaparib vs. ABT-263                   | -0,4764 to 0,02533  | No           | ns      | 0,1056           |
| Olaparib vs. Combo                     | -0,1691 to 0,3128   | No           | ns      | >0,9999          |
| ABT-263 vs. Combo                      | 0,04540 to 0,5494   | Yes          | *       | 0,0113           |
| Row 5                                  |                     |              |         |                  |
| Control vs. Olaparib                   | 0,04687 to 0,5752   | Yes          | *       | 0,0116           |
| Control vs. ABT-263                    | -0,2793 to 0,2693   | No           | ns      | >0,9999          |
| Control vs. Combo                      | 0,2477 to 0,7781    | Yes          | ****    | <0,0001          |
| Olaparib vs. ABT-263                   | -0,5669 to -0,06514 | Yes          | **      | 0,0055           |
| Olaparib vs. Combo                     | -0,03913 to 0,4428  | No           | ns      | 0,1614           |
| ABT-263 vs. Combo                      | 0,2659 to 0,7698    | Yes          | ****    | <0,0001          |
| Row 6                                  |                     |              |         |                  |
| Control vs. Olaparib                   | 0,02560 to 0,6055   | Yes          | *       | 0,0247           |
| Control vs. ABT-263                    | -0,3692 to 0,2428   | No           | ns      | >0,9999          |
| Control vs. Combo                      | 0,2227 to 0,8192    | Yes          | ****    | <0,0001          |
| Olaparib vs. ABT-263                   | -0,6495 to -0,1080  | Yes          | **      | 0,0014           |
| Olaparib vs. Combo                     | -0,05652 to 0,4674  | No           | ns      | 0,2291           |
| ABT-263 vs. Combo                      | 0,3046 to 0,8638    | Yes          | ****    | <0,0001          |
| Row 7                                  |                     |              |         |                  |
| Control vs. Olaparib                   | 0,03929 to 0,6192   | Yes          | *       | 0,0166           |
| Control vs. ABT-263                    | -0,2530 to 0,3590   | No           | ns      | >0,9999          |
| Control vs. Combo                      | 0,3156 to 0,9121    | Yes          | ****    | <0,0001          |
|                                        | -0,5470 to -        |              |         |                  |
| Olaparib vs. ABT-263                   | 0,005538            | Yes          | *       | 0,0427           |
| Olaparib vs. Combo                     | 0,02265 to 0,5465   | Yes          | *       | 0,0251           |
| ABT-263 vs. Combo                      | 0,2812 to 0,8405    | Yes          | ****    | <0,0001          |

**Supplementary Table 2**

**MDA-MB-231 2-way Anova test with Bonferroni post-test corrections**

| Bonferroni's multiple comparisons test | 95,00% CI of diff, | Significant? | Summary | Adjusted P Value |
|----------------------------------------|--------------------|--------------|---------|------------------|
| Row 1                                  |                    |              |         |                  |
| Control vs. Olaparib                   | -105,0 to 40,93    | No           | ns      | >0,9999          |
| Control vs. ABT-263                    | -81,47 to 64,48    | No           | ns      | >0,9999          |
| Control vs. Olaparib + ABT-263         | -103,9 to 42,07    | No           | ns      | >0,9999          |
| Olaparib vs. ABT-263                   | -48,16 to 95,25    | No           | ns      | >0,9999          |
| Olaparib vs. Olaparib + ABT-263        | -70,57 to 72,85    | No           | ns      | >0,9999          |
| ABT-263 vs. Olaparib + ABT-263         | -94,11 to 49,30    | No           | ns      | >0,9999          |
| Row 2                                  |                    |              |         |                  |
| Control vs. Olaparib                   | -38,82 to 107,1    | No           | ns      | >0,9999          |
| Control vs. ABT-263                    | -68,99 to 76,96    | No           | ns      | >0,9999          |
| Control vs. Olaparib + ABT-263         | -70,89 to 75,06    | No           | ns      | >0,9999          |
| Olaparib vs. ABT-263                   | -101,9 to 41,53    | No           | ns      | >0,9999          |
| Olaparib vs. Olaparib + ABT-263        | -103,8 to 39,63    | No           | ns      | >0,9999          |
| ABT-263 vs. Olaparib + ABT-263         | -73,61 to 69,81    | No           | ns      | >0,9999          |
| Row 3                                  |                    |              |         |                  |
| Control vs. Olaparib                   | -38,41 to 107,5    | No           | ns      | >0,9999          |
| Control vs. ABT-263                    | -53,85 to 92,10    | No           | ns      | >0,9999          |
| Control vs. Olaparib + ABT-263         | -52,89 to 93,06    | No           | ns      | >0,9999          |
| Olaparib vs. ABT-263                   | -87,15 to 56,27    | No           | ns      | >0,9999          |
| Olaparib vs. Olaparib + ABT-263        | -86,19 to 57,23    | No           | ns      | >0,9999          |
| ABT-263 vs. Olaparib + ABT-263         | -70,75 to 72,67    | No           | ns      | >0,9999          |
| Row 4                                  |                    |              |         |                  |
| Control vs. Olaparib                   | -40,37 to 105,6    | No           | ns      | >0,9999          |
| Control vs. ABT-263                    | -62,39 to 83,56    | No           | ns      | >0,9999          |
| Control vs. Olaparib + ABT-263         | -42,78 to 103,2    | No           | ns      | >0,9999          |
| Olaparib vs. ABT-263                   | -93,73 to 49,69    | No           | ns      | >0,9999          |
| Olaparib vs. Olaparib + ABT-263        | -74,11 to 69,30    | No           | ns      | >0,9999          |
| ABT-263 vs. Olaparib + ABT-263         | -52,09 to 91,32    | No           | ns      | >0,9999          |
| Row 5                                  |                    |              |         |                  |
| Control vs. Olaparib                   | 27,74 to 173,7     | Yes          | **      | 0,0017           |
| Control vs. ABT-263                    | -44,90 to 101,0    | No           | ns      | >0,9999          |
| Control vs. Olaparib + ABT-263         | 68,76 to 214,7     | Yes          | ****    | <0,0001          |
| Olaparib vs. ABT-263                   | -144,3 to -0,9342  | Yes          | *       | 0,0452           |
| Olaparib vs. Olaparib + ABT-263        | -30,68 to 112,7    | No           | ns      | 0,78             |
| ABT-263 vs. Olaparib + ABT-263         | 41,96 to 185,4     | Yes          | ***     | 0,0002           |
| Row 6                                  |                    |              |         |                  |
| Control vs. Olaparib                   | -0,007868 to 145,9 | No           | ns      | 0,05             |
| Control vs. ABT-263                    | -87,57 to 58,38    | No           | ns      | >0,9999          |
| Control vs. Olaparib + ABT-263         | 84,85 to 230,8     | Yes          | ****    | <0,0001          |
| Olaparib vs. ABT-263                   | -159,3 to -15,86   | Yes          | **      | 0,0078           |
| Olaparib vs. Olaparib + ABT-263        | 13,15 to 156,6     | Yes          | *       | 0,011            |
| ABT-263 vs. Olaparib + ABT-263         | 100,7 to 244,1     | Yes          | ****    | <0,0001          |
| Row 7                                  |                    |              |         |                  |
| Control vs. Olaparib                   | 27,40 to 173,3     | Yes          | **      | 0,0018           |
| Control vs. ABT-263                    | -75,76 to 70,19    | No           | ns      | >0,9999          |
| Control vs. Olaparib + ABT-263         | 126,1 to 272,0     | Yes          | ****    | <0,0001          |
| Olaparib vs. ABT-263                   | -174,9 to -31,45   | Yes          | ***     | 0,001            |
| Olaparib vs. Olaparib + ABT-263        | 26,96 to 170,4     | Yes          | **      | 0,0018           |
| ABT-263 vs. Olaparib + ABT-263         | 130,1 to 273,5     | Yes          | ****    | <0,0001          |

**Supplementary Table 3**
